# Supplementary material for: Correlation between the acid–base properties of the La2O3 catalyst and its methane reactivity
Source: Royal Society of Chemistry journal article supplement (doi:10.1039/c6cp02459a), 2016-01-01
Supplement: c6cp02459a1.pdf [file c6cp02459a1.pdf]

## Supplementary Information

### Correlation between the acid-base properties of the $\text{La}_2\text{O}_3$ catalyst and its methane reactivity

Changqing Chu,<sup>a,b</sup> Yonghui Zhao,<sup>a</sup> Shenggang Li,<sup>a,c,\*</sup> and Yuhan Sun<sup>a,c</sup>

<sup>a</sup>CAS Key Laboratory of Low-Carbon Conversion Science and Engineering, Shanghai Advanced Research Institute, Chinese Academy of Sciences, 100 Haik Road, Shanghai 201210, China.

<sup>b</sup>University of Chinese Academy of Sciences, 19 Yuquan Road, Shijingshan District, Beijing 100049, China

<sup>c</sup>School of Physical Science and Technology, ShanghaiTech University, 100 Haik Road, Shanghai 201210, China

This supplementary information is divided into three sections, briefly summarized below.

**Section 1:** complete list of references 41 and 42.

**Section 2:** additional figures:

**Figure S1.** Structures of Protonated Clusters and Clusters with the  $\text{F}^-$  Anion Attached.

**Figure S2.** Structures of Clusters upon  $\text{CO}_2$  Chemisorption.

**Figure S3.** Potential Energy Surfaces for  $\text{CH}_4$  Activation by  $\text{La}_4\text{O}_6$  ( $\text{C}_{2v}$ ) and ( $\text{C}_{2h}$ ).

**Section 3:** additional tables for Cartesian coordinates of structures in **Figures S1-S3**.

## Section 1.

### Complete lists of references 41 and 42

**Ref. 41:** Gaussian 09, Revision C.01, M. J. Frisch, G. W. Trucks, H. B. Schlegel, G. E. Scuseria, M. A. Robb, J. R. Cheeseman, G. Scalmani, V. Barone, B. Mennucci, G. A. Petersson, H. Nakatsuji, M. Caricato, X. Li, H. P. Hratchian, A. F. Izmaylov, J. Bloino, G. Zheng, J. L. Sonnenberg, M. Hada, M. Ehara, K. Toyota, R. Fukuda, J. Hasegawa, M. Ishida, T. Nakajima, Y. Honda, O. Kitao, H. Nakai, T. Vreven, J. A. Montgomery, Jr., J. E. Peralta, F. Ogliaro, M. Bearpark, J. J. Heyd, E. Brothers, K. N. Kudin, V. N. Staroverov, R. Kobayashi, J. Normand, K. Raghavachari, A. Rendell, J. C. Burant, S. S. Iyengar, J. Tomasi, M. Cossi, N. Rega, J. M. Millam, M. Klene, J. E. Knox, J. B. Cross, V. Bakken, C. Adamo, J. Jaramillo, R. Gomperts, R. E. Stratmann, O. Yazyev, A. J. Austin, R. Cammi, C. Pomelli, J. W. Ochterski, R. L. Martin, K. Morokuma, V. G. Zakrzewski, G. A. Voth, P. Salvador, J. J. Dannenberg, S. Dapprich, A. D. Daniels, Ö. Farkas, J. B. Foresman, J. V. Ortiz, J. Cioslowski, and D. J. Fox, Gaussian, Inc., Wallingford CT, 2009.

**Ref. 42:** MOLPRO, version 2012.1, a package of ab initio programs, H.-J. Werner, P. J. Knowles, G. Knizia, F. R. Manby, M. Schütz, P. Celani, T. Korona, R. Lindh, A. Mitrushenkov, G. Rauhut, K. R. Shamasundar, T. B. Adler, R. D. Amos, A. Bernhardsson, A. Berning, D. L. Cooper, M. J. O. Deegan, A. J. Dobbyn, F. Eckert, E. Goll, C. Hampel, A. Hesselmann, G. Hetzer, T. Hrenar, G. Jansen, C. Köppl, Y. Liu, A. W. Lloyd, R. A. Mata, A. J. May, S. J. McNicholas, W. Meyer, M. E. Mura, A. Nicklass, D. P. O'Neill, P. Palmieri, D. Peng, K. Pflüger, R. Pitzer, M. Reiher, T. Shiozaki, H. Stoll, A. J. Stone, R. Tarroni, T. Thorsteinsson, and M. Wang, see <http://www.molpro.net>.

**Section 2.**

**Figure S1.** Structures of (a) the Protonated Clusters and (b) Clusters with the  $F^-$  Anion Attached with Selected B3LYP/aVDZ Bond Distances Shown in Å.

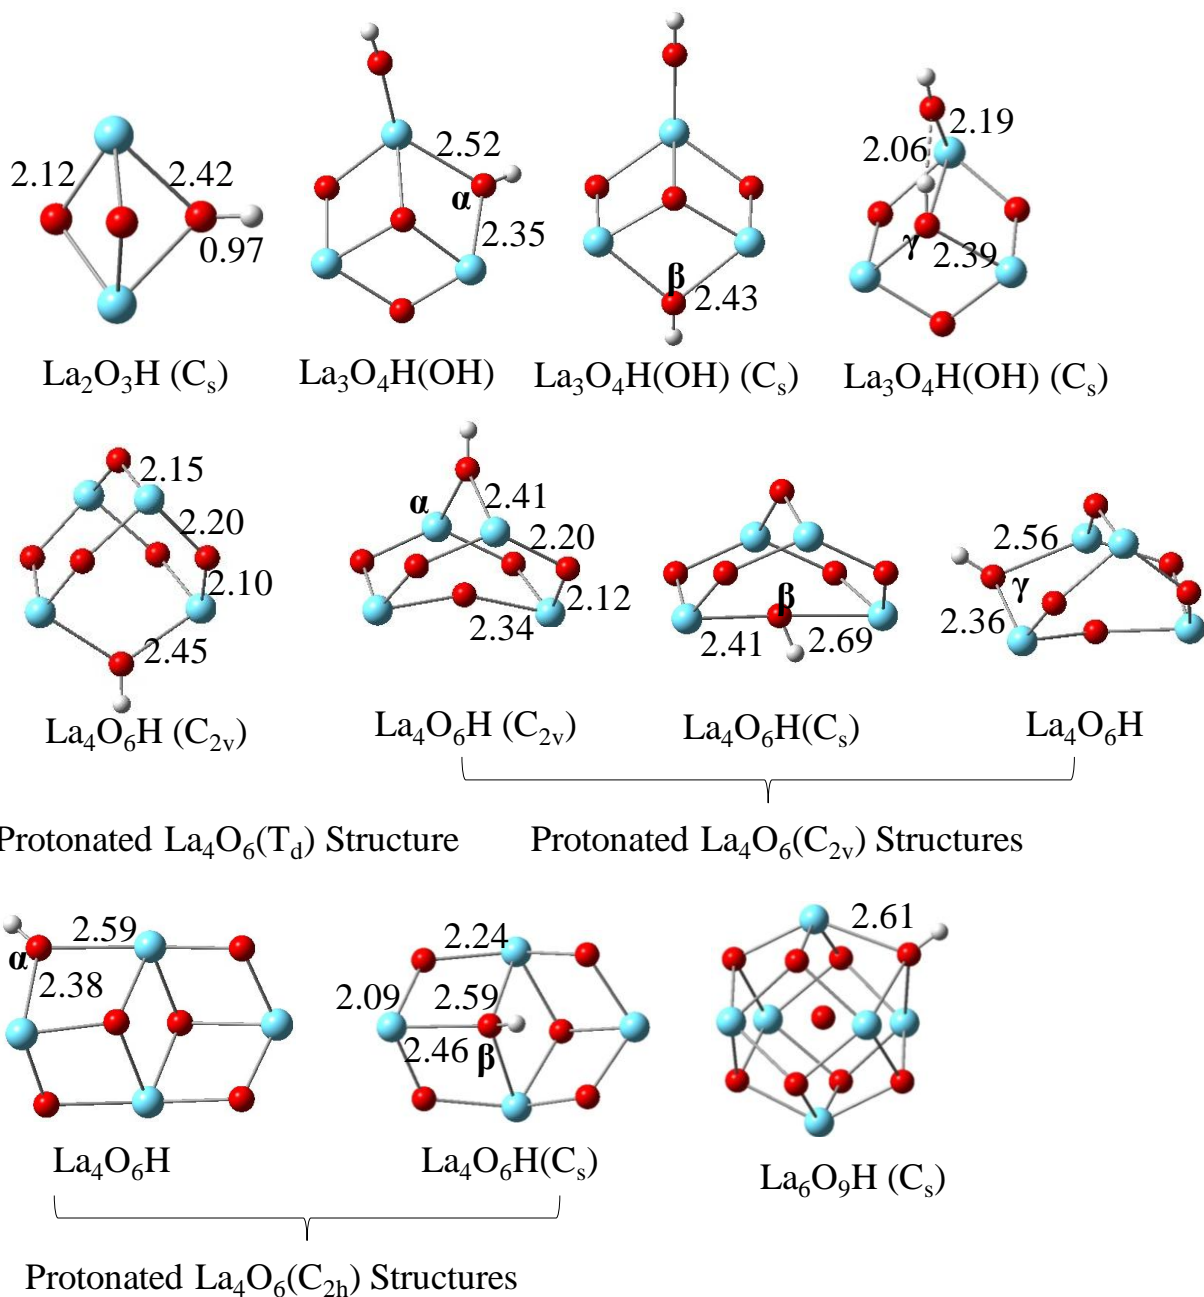

(a)

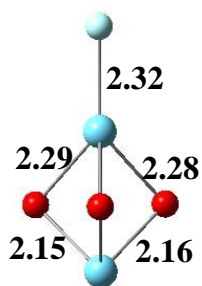

$\text{La}_2\text{O}_3\text{F}$  ( $C_s$ )

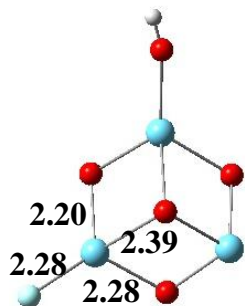

$\text{La}_3\text{O}_4(\text{OH})\text{F}$

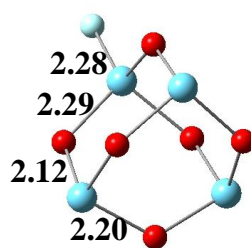

$\text{La}_4\text{O}_6\text{F}$  ( $C_{3v}$ )

$\text{F}^-$  Binding  $\text{La}_4\text{O}_6(\text{T}_d)$  Structure

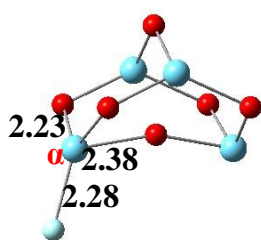

$\text{La}_4\text{O}_6\text{F}$  ( $C_s$ )

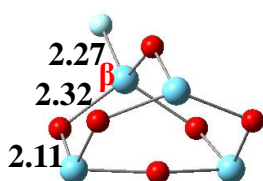

$\text{La}_4\text{O}_6\text{F}$  ( $C_s$ )

$\text{F}^-$  Binding  $\text{La}_4\text{O}_6(\text{C}_{2v})$  Structures

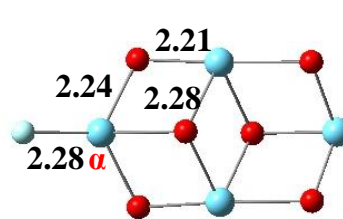

$\text{La}_4\text{O}_6\text{F}$  ( $C_s$ )

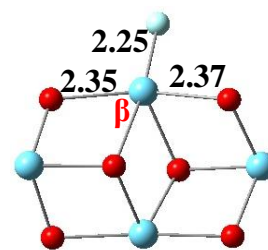

$\text{La}_4\text{O}_6\text{F}$

$\text{F}^-$  Binding  $\text{La}_4\text{O}_6(\text{C}_{2h})$  Structures

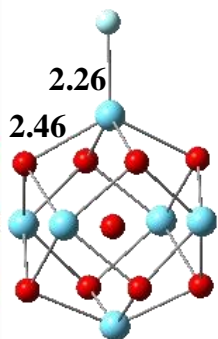

$\text{La}_6\text{O}_9\text{F}$  ( $C_{4v}$ )

(b)

**Figure S2.** Structures of Clusters upon CO<sub>2</sub> Chemisorption with Selected B3LYP/aVDZ Bond

Distances Shown in Å.

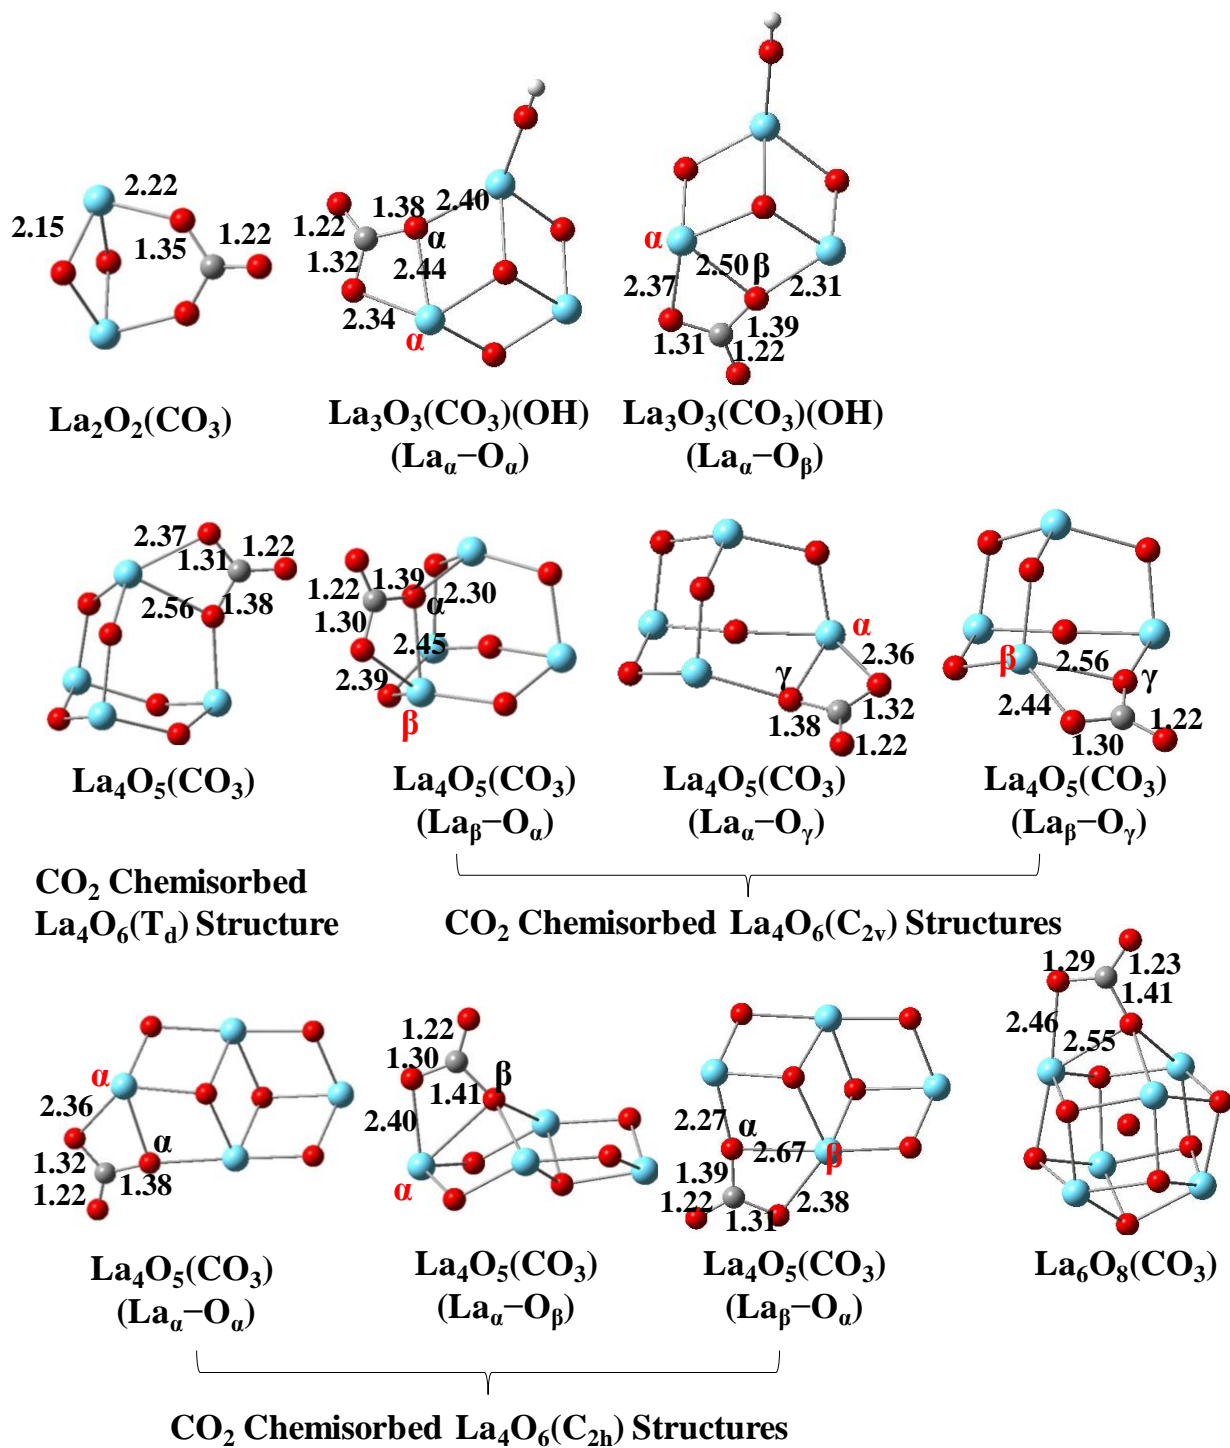

**Figure S3.** Potential Energy Surfaces for CH<sub>4</sub> Activation by (a) La<sub>4</sub>O<sub>6</sub>(C<sub>2v</sub>) and (b) La<sub>4</sub>O<sub>6</sub>(C<sub>2h</sub>) with Relative Energies at 0 K Calculated at the CCSD(T)/aVDZ Level Shown in kcal/mol.

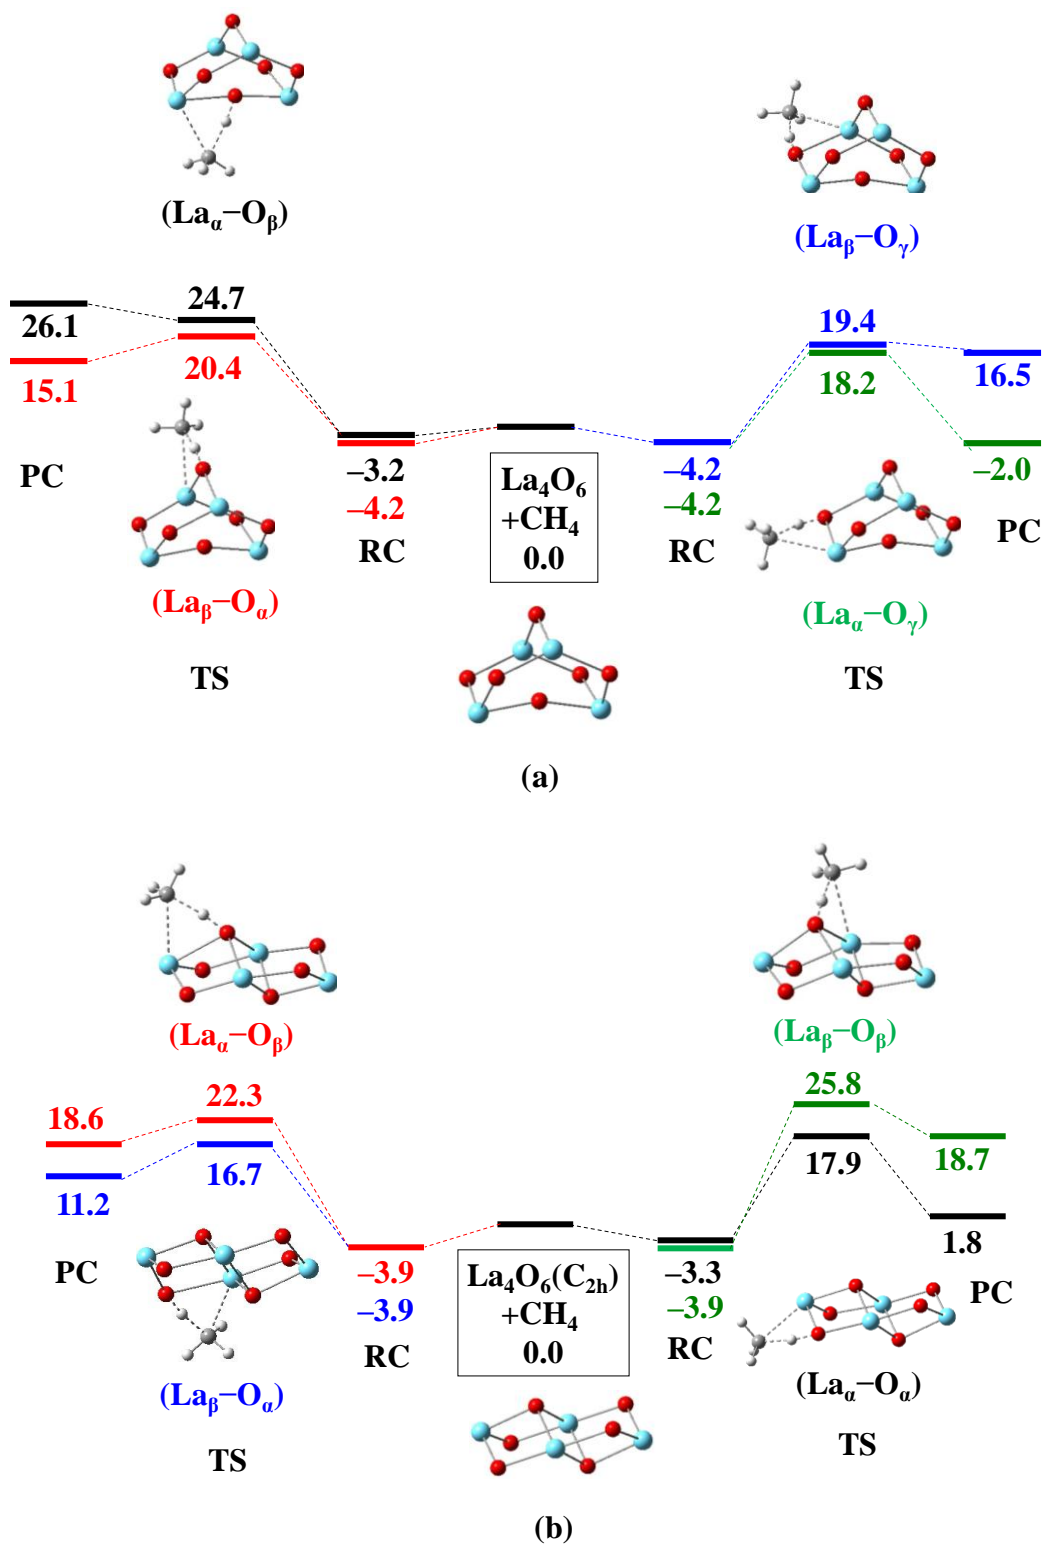

### Section 3.

**Table S1.** Cartesian Coordinates in Angstroms Optimized at the B3LYP/aVDZ Level for Structures Shown by **Figure S1**.

#### **La<sub>2</sub>O<sub>3</sub>H (C<sub>s</sub>)**

Charge: +1 Spin Multiplicity: 1

|    |             |             |             |
|----|-------------|-------------|-------------|
| La | 0.05815600  | 0.02447900  | 1.56440900  |
| O  | 0.05815600  | 1.46448800  | 0.00000000  |
| La | 0.05815600  | 0.02447900  | -1.56440900 |
| O  | 1.05159300  | -1.00082300 | 0.00000000  |
| O  | -1.61840400 | -0.74565300 | 0.00000000  |
| H  | -2.56051300 | -0.53467300 | 0.00000000  |

#### **La<sub>3</sub>O<sub>4</sub>H(OH)**

(O<sub>α</sub>)

Charge: +1 Spin Multiplicity: 1

|    |             |             |             |
|----|-------------|-------------|-------------|
| La | 1.59717900  | 1.46069800  | 0.16701000  |
| O  | 2.24543800  | -0.35378000 | -0.60321400 |
| O  | 0.12817200  | 0.10598000  | 1.04716500  |
| La | 0.81239500  | -1.90642700 | 0.05649000  |
| O  | -1.00582600 | -1.57952500 | -0.87043700 |
| La | -1.94481100 | 0.31518400  | -0.17872200 |
| O  | -0.36324400 | 2.11767700  | -0.95532800 |
| O  | -3.69233600 | 0.26432100  | 1.05709700  |
| H  | -4.46090800 | 0.17200000  | 1.62773100  |
| H  | -0.52825700 | 2.83166800  | -1.58233700 |

(O<sub>β</sub>)

Charge: +1 Spin Multiplicity: 1

|    |             |             |             |
|----|-------------|-------------|-------------|
| La | 0.39874400  | -1.04315900 | 1.84534700  |
| O  | 1.83781400  | -1.68957500 | 0.00000000  |
| O  | -0.78281500 | -0.74004600 | 0.00000000  |
| La | 0.39874400  | -1.04315900 | -1.84534700 |
| O  | 0.39874400  | 0.96886800  | -1.88111700 |
| La | -0.66129900 | 1.80434000  | 0.00000000  |
| O  | 0.39874400  | 0.96886800  | 1.88111700  |
| O  | -2.71402000 | 2.40949800  | 0.00000000  |
| H  | -3.65295900 | 2.61646700  | 0.00000000  |
| H  | 2.78239800  | -1.88466700 | 0.00000000  |

(O<sub>γ</sub>)

Charge: +1 Spin Multiplicity: 1

|    |             |             |             |
|----|-------------|-------------|-------------|
| La | 0.35947600  | -1.13821500 | 1.76084100  |
| O  | 1.42916700  | -1.70584300 | 0.00000000  |
| O  | -1.25861900 | -1.14029900 | 0.00000000  |
| La | 0.35947600  | -1.13821500 | -1.76084100 |
| O  | 0.35947600  | 0.95698100  | -1.64949000 |
| La | -0.39965700 | 2.17289200  | 0.00000000  |

|   |             |             |            |
|---|-------------|-------------|------------|
| O | 0.35947600  | 0.95698100  | 1.64949000 |
| O | -2.48796800 | 1.52647100  | 0.00000000 |
| H | -3.44597200 | 1.61176400  | 0.00000000 |
| H | -1.96602800 | -0.46439300 | 0.00000000 |

**La<sub>4</sub>O<sub>6</sub>H**  
**(La<sub>4</sub>O<sub>6</sub> (T<sub>d</sub>))**

Charge: +1 Spin Multiplicity: 1

|    |             |             |             |
|----|-------------|-------------|-------------|
| O  | 1.61280600  | 1.62107100  | -0.05752800 |
| La | 0.00000000  | 2.08181400  | -1.32293500 |
| La | 1.95554800  | 0.00000000  | 1.39306000  |
| O  | -1.61280600 | 1.62107100  | -0.05752800 |
| O  | 0.00000000  | 0.00000000  | -2.61415100 |
| O  | 0.00000000  | 0.00000000  | 2.29233500  |
| O  | 1.61280600  | -1.62107100 | -0.05752800 |
| La | -1.95554800 | 0.00000000  | 1.39306000  |
| La | 0.00000000  | -2.08181400 | -1.32293500 |
| O  | -1.61280600 | -1.62107100 | -0.05752800 |
| H  | 0.00000000  | 0.00000000  | -3.57873400 |

**La<sub>4</sub>O<sub>6</sub>H**  
**(La<sub>4</sub>O<sub>6</sub> (C<sub>2v</sub>), O<sub>α</sub>)**

Charge: +1 Spin Multiplicity: 1

|    |             |             |             |
|----|-------------|-------------|-------------|
| La | 0.00000000  | 2.29982800  | -1.08846400 |
| O  | 1.76603000  | 2.01585500  | 0.05311100  |
| O  | 0.00000000  | 0.00000000  | 2.39953600  |
| O  | 0.00000000  | 0.00000000  | -0.67597700 |
| La | 1.91001500  | 0.00000000  | 0.92310200  |
| O  | 1.76603000  | -2.01585500 | 0.05311100  |
| La | 0.00000000  | -2.29982800 | -1.08846400 |
| O  | -1.76603000 | 2.01585500  | 0.05311100  |
| La | -1.91001500 | 0.00000000  | 0.92310200  |
| O  | -1.76603000 | -2.01585500 | 0.05311100  |
| H  | 0.00000000  | 0.00000000  | 3.36318600  |

**La<sub>4</sub>O<sub>6</sub>H**  
**(La<sub>4</sub>O<sub>6</sub> (C<sub>2v</sub>), O<sub>β</sub>)**

Charge: +1 Spin Multiplicity: 1

|    |             |             |             |
|----|-------------|-------------|-------------|
| La | 1.04785700  | 2.50553000  | 0.00000000  |
| O  | -0.05654700 | 2.14452600  | 1.74002600  |
| O  | -2.04659500 | 0.01918000  | 0.00000000  |
| O  | 0.97403300  | 0.09189600  | 0.00000000  |
| La | -0.93769800 | 0.02403200  | 1.85412400  |
| O  | -0.05654700 | -2.01771800 | 1.78435900  |
| La | 0.97662300  | -2.59919300 | 0.00000000  |
| O  | -0.05654700 | 2.14452600  | -1.74002600 |
| La | -0.93769800 | 0.02403200  | -1.85412400 |



|   |             |             |             |
|---|-------------|-------------|-------------|
| O | -0.05654700 | -2.01771800 | -1.78435900 |
| H | 1.89215700  | -0.31839400 | 0.00000000  |

**La<sub>4</sub>O<sub>6</sub>H**

**(La<sub>4</sub>O<sub>6</sub> (C<sub>2v</sub>), O<sub>γ</sub>)**

Charge: +1 Spin Multiplicity: 1

|    |             |             |             |
|----|-------------|-------------|-------------|
| La | 2.14617600  | -0.34272500 | -1.15532200 |
| O  | 2.14127100  | -1.97766900 | 0.54053000  |
| O  | 0.11412400  | 0.28560200  | 1.97794400  |
| O  | 0.03096600  | -0.84373200 | -1.05957100 |
| La | -0.29477700 | -1.68463300 | 1.27968300  |
| O  | -2.28653800 | -1.32976800 | 0.44938300  |
| La | -2.14541300 | -0.03828200 | -1.21251300 |
| O  | 1.92531200  | 1.56565100  | -0.37258900 |
| La | 0.18533600  | 2.17015600  | 0.90958900  |
| O  | -1.50652900 | 1.83830800  | -0.40504100 |
| H  | 2.84578200  | -2.26458100 | 1.13282600  |

**La<sub>4</sub>O<sub>6</sub>H**

**(La<sub>4</sub>O<sub>6</sub> (C<sub>2h</sub>), O<sub>α</sub>)**

Charge: +1 Spin Multiplicity: 1

|    |             |             |             |
|----|-------------|-------------|-------------|
| La | -3.05942200 | -0.10685200 | -0.08068000 |
| O  | -1.97618800 | -1.78155800 | -0.75190200 |
| O  | -1.04823000 | 0.02766000  | 1.17462700  |
| O  | 0.96195700  | 0.13079800  | -0.91542800 |
| La | 0.02819600  | -1.76079500 | 0.21208500  |
| O  | 2.36200800  | -1.71568400 | 0.58563000  |
| La | 3.08185100  | -0.04698400 | -0.29495200 |
| O  | -2.14148400 | 1.69941300  | -0.77204900 |
| La | -0.16653900 | 1.83245000  | 0.11840300  |
| O  | 2.32095600  | 1.91465300  | 0.81917400  |
| H  | 2.77491800  | 2.48209800  | 1.45276600  |

**La<sub>4</sub>O<sub>6</sub>H**

**(La<sub>4</sub>O<sub>6</sub> (C<sub>2h</sub>), O<sub>β</sub>)**

Charge: +1 Spin Multiplicity: 1

|    |             |             |             |
|----|-------------|-------------|-------------|
| La | 1.46433400  | 2.56306400  | 0.00000000  |
| O  | 0.37961800  | 2.01173100  | 1.73318100  |
| O  | 1.63853500  | 0.18158600  | 0.00000000  |
| O  | -1.37056700 | 0.11923100  | 0.00000000  |
| La | 0.37961800  | -0.19246400 | 1.87975600  |
| O  | -0.84086800 | -2.06187700 | 1.65361700  |
| La | -2.10229500 | -2.22442400 | 0.00000000  |
| O  | 0.37961800  | 2.01173100  | -1.73318100 |
| La | 0.37961800  | -0.19246400 | -1.87975600 |
| O  | -0.84086800 | -2.06187700 | -1.65361700 |
| H  | -1.67641600 | 1.03421700  | 0.00000000  |

**La<sub>6</sub>O<sub>9</sub>H**

Charge: +1 Spin Multiplicity: 1

|    |             |             |             |
|----|-------------|-------------|-------------|
| La | -1.90871200 | -1.58752900 | 0.00000000  |
| La | -1.15792300 | 1.26384900  | 1.80555400  |
| O  | -2.53272900 | 0.66974500  | 0.00000000  |
| La | -1.15792300 | 1.26384900  | -1.80555400 |
| La | 1.13915200  | -1.32057900 | 1.76460000  |
| O  | 0.21840900  | -2.50878300 | 0.00000000  |
| La | 1.13915200  | -1.32057900 | -1.76460000 |
| O  | -1.15792300 | -0.96895700 | 2.14827800  |
| O  | 1.14909500  | 0.99492500  | 2.13669000  |
| O  | -0.01796400 | 0.19833900  | 0.00000000  |
| La | 1.96062000  | 1.53726500  | 0.00000000  |
| O  | 2.54392900  | -0.64276900 | 0.00000000  |
| O  | -1.15792300 | -0.96895700 | -2.14827800 |
| O  | -0.25435700 | 2.91373200  | 0.00000000  |
| O  | 1.14909500  | 0.99492500  | -2.13669000 |
| H  | -0.33589100 | 3.87468600  | 0.00000000  |

**La<sub>2</sub>O<sub>3</sub>F**

Charge: -1 Spin Multiplicity: 1

|    |             |             |             |
|----|-------------|-------------|-------------|
| La | -0.29486800 | 1.26772300  | 0.00000000  |
| O  | -0.72146500 | -0.49365700 | 1.40199400  |
| La | 0.38204000  | -1.69751900 | 0.00000000  |
| O  | -0.72146500 | -0.49365700 | -1.40199400 |
| O  | 1.63347800  | 0.05846700  | 0.00000000  |
| F  | -0.72146500 | 3.54768500  | 0.00000000  |

**La<sub>3</sub>O<sub>4</sub>(OH)F**

Charge: -1 Spin Multiplicity: 1

|    |             |             |             |
|----|-------------|-------------|-------------|
| La | 0.09010300  | 2.15369300  | 0.15029900  |
| O  | 1.79501700  | 1.27062400  | -0.78067900 |
| O  | 0.01250300  | 0.16037100  | 1.16633900  |
| La | 1.73972700  | -0.90907600 | -0.09911600 |
| O  | -0.06670200 | -1.86199200 | -0.92795200 |
| La | -1.80205200 | -0.77805800 | -0.11084000 |
| O  | -1.67209800 | 1.42014800  | -0.78104900 |
| O  | -3.70657100 | -1.76638400 | 0.73901800  |
| H  | -4.34930400 | -2.36763600 | 1.12251300  |
| F  | 3.54097300  | -2.00093200 | 0.77249800  |

**La<sub>4</sub>O<sub>6</sub>F****(La<sub>4</sub>O<sub>6</sub>(T<sub>d</sub>))**

Charge: -1 Spin Multiplicity: 1

|    |             |             |             |
|----|-------------|-------------|-------------|
| O  | 0.00000000  | 1.99151100  | 1.16180000  |
| La | 0.00000000  | 0.00000000  | 2.28813200  |
| La | 0.00000000  | 2.24039600  | -0.94679600 |
| O  | 1.72469900  | -0.99575500 | 1.16180000  |
| O  | -1.72469900 | -0.99575500 | 1.16180000  |

|    |             |             |             |
|----|-------------|-------------|-------------|
| O  | 1.69331600  | 0.97763600  | -1.56183200 |
| O  | -1.69331600 | 0.97763600  | -1.56183200 |
| La | 1.94024000  | -1.12019800 | -0.94679600 |
| La | -1.94024000 | -1.12019800 | -0.94679600 |
| O  | 0.00000000  | -1.95527300 | -1.56183200 |
| F  | 0.00000000  | 0.00000000  | 4.56437900  |

**La<sub>4</sub>O<sub>6</sub>F**

(La<sub>4</sub>O<sub>6</sub>(C<sub>2v</sub>), La<sub>α</sub>)

Charge: -1 Spin Multiplicity: 1

|    |             |             |             |
|----|-------------|-------------|-------------|
| La | -1.80718700 | -1.63189700 | 0.00000000  |
| O  | -0.61991300 | -1.81231400 | 1.88459000  |
| O  | 2.17290300  | -0.88950300 | 0.00000000  |
| O  | -0.51954800 | 0.36931000  | 0.00000000  |
| La | 1.03715600  | -0.35226300 | 1.79764500  |
| O  | 1.03715600  | 1.99679400  | 1.77149400  |
| La | 0.02576300  | 2.56444200  | 0.00000000  |
| O  | -0.61991300 | -1.81231400 | -1.88459000 |
| La | 1.03715600  | -0.35226300 | -1.79764500 |
| O  | 1.03715600  | 1.99679400  | -1.77149400 |
| F  | -4.06637000 | -1.30969600 | 0.00000000  |

**La<sub>4</sub>O<sub>6</sub>F**

(La<sub>4</sub>O<sub>6</sub>(C<sub>2v</sub>), La<sub>β</sub>)

Charge: -1 Spin Multiplicity: 1

|    |             |             |             |
|----|-------------|-------------|-------------|
| La | 1.22698400  | -0.09449700 | 2.21313900  |
| O  | 0.05765400  | -1.87703500 | 2.17959500  |
| O  | -1.98128900 | -0.30313400 | 0.00000000  |
| O  | 1.33824100  | -0.50636600 | 0.00000000  |
| La | -0.72307400 | -2.00346000 | 0.00000000  |
| O  | 0.05765400  | -1.87703500 | -2.17959500 |
| La | 1.22698400  | -0.09449700 | -2.21313900 |
| O  | 0.05765400  | 1.63553300  | 1.92065300  |
| La | -1.23623200 | 1.82238500  | 0.00000000  |
| O  | 0.05765400  | 1.63553300  | -1.92065300 |
| F  | -2.76625400 | 3.49266400  | 0.00000000  |

**La<sub>4</sub>O<sub>6</sub>F**

(La<sub>4</sub>O<sub>6</sub>(C<sub>2h</sub>), La<sub>α</sub>)

Charge: -1 Spin Multiplicity: 1

|    |             |             |             |
|----|-------------|-------------|-------------|
| La | -1.48777900 | -2.83044800 | 0.00000000  |
| O  | -0.36526100 | -2.52694200 | 1.76960700  |
| O  | -1.43314400 | -0.56545800 | 0.00000000  |
| O  | 1.39134500  | 0.29165300  | 0.00000000  |
| La | 0.04325100  | -0.17732500 | 1.78011100  |
| O  | 0.04325100  | 2.02989000  | 1.88018500  |
| La | 1.06319000  | 2.69528100  | 0.00000000  |
| O  | -0.36526100 | -2.52694200 | -1.76960700 |
| La | 0.04325100  | -0.17732500 | -1.78011100 |

|   |            |            |             |
|---|------------|------------|-------------|
| O | 0.04325100 | 2.02989000 | -1.88018500 |
| F | 2.75083300 | 4.22920000 | 0.00000000  |

**La<sub>4</sub>O<sub>6</sub>F**

(La<sub>4</sub>O<sub>6</sub>(C<sub>2h</sub>), La<sub>β</sub>)

Charge: -1 Spin Multiplicity: 1

|    |             |             |             |
|----|-------------|-------------|-------------|
| La | 2.95295900  | -0.28763500 | 0.11087200  |
| O  | 2.03158500  | -2.17661700 | 0.56230400  |
| O  | 1.04871200  | -0.05969300 | -1.14967300 |
| O  | -0.96674700 | -0.32939400 | 1.10420800  |
| La | -0.10852100 | -1.86694500 | -0.28106100 |
| O  | -2.34567900 | -1.75335600 | -0.89174300 |
| La | -3.01089700 | -0.06843100 | 0.27833700  |
| O  | 2.09043100  | 1.28068200  | 1.16628000  |
| La | 0.09954900  | 1.81079500  | -0.01297100 |
| O  | -2.22571700 | 1.76463500  | -0.38100800 |
| F  | 0.75035600  | 3.74292000  | -0.96756700 |

**La<sub>6</sub>O<sub>9</sub>F**

Charge: -1 Spin Multiplicity: 1

|    |             |             |             |
|----|-------------|-------------|-------------|
| La | 0.00000000  | 2.43508100  | 0.11108900  |
| La | 2.43508100  | 0.00000000  | 0.11108900  |
| O  | 1.54735900  | 1.54735900  | -1.37085000 |
| La | 0.00000000  | 0.00000000  | -2.48683100 |
| La | 0.00000000  | 0.00000000  | 2.58395400  |
| O  | -1.54551000 | 1.54551000  | 1.69248000  |
| La | -2.43508100 | 0.00000000  | 0.11108900  |
| O  | 1.54551000  | 1.54551000  | 1.69248000  |
| O  | 1.54551000  | -1.54551000 | 1.69248000  |
| O  | 0.00000000  | 0.00000000  | 0.19599800  |
| La | 0.00000000  | -2.43508100 | 0.11108900  |
| O  | -1.54551000 | -1.54551000 | 1.69248000  |
| O  | -1.54735900 | 1.54735900  | -1.37085000 |
| O  | 1.54735900  | -1.54735900 | -1.37085000 |
| O  | -1.54735900 | -1.54735900 | -1.37085000 |
| F  | 0.00000000  | 0.00000000  | -4.74715600 |

**Table S2.** Cartesian Coordinates in Angstroms Optimized at the B3LYP/aVDZ Level for the Structures Shown in **Figure S2**.

**La<sub>2</sub>O<sub>3</sub>, D<sub>3h</sub>**

|    |           |           |           |
|----|-----------|-----------|-----------|
| LA | 0.000000  | 0.000000  | 1.502187  |
| O  | 0.000000  | 1.567729  | 0.000000  |
| LA | 0.000000  | 0.000000  | -1.502187 |
| O  | 1.357693  | -0.783865 | 0.000000  |
| O  | -1.357693 | -0.783865 | 0.000000  |

**La<sub>3</sub>O<sub>4</sub>(OH), C<sub>s</sub>**

|    |           |           |           |
|----|-----------|-----------|-----------|
| LA | 0.447866  | -1.086245 | 1.729211  |
| O  | 1.617031  | -1.693433 | 0.000000  |
| O  | -0.974361 | -0.661739 | 0.000000  |
| LA | 0.447866  | -1.086245 | -1.729211 |
| O  | 0.447866  | 0.993385  | -1.826239 |
| LA | -0.692825 | 1.748039  | 0.000000  |
| O  | 0.447866  | 0.993385  | 1.826239  |
| O  | -2.559540 | 2.963467  | 0.000000  |
| H  | -3.396669 | 3.433179  | 0.000000  |

**La<sub>4</sub>O<sub>6</sub>, T<sub>d</sub>**

|    |           |           |           |
|----|-----------|-----------|-----------|
| O  | 0.000000  | 0.000000  | 2.352531  |
| LA | 1.375511  | 1.375511  | 1.375511  |
| LA | -1.375511 | -1.375511 | 1.375511  |
| O  | 0.000000  | 2.352531  | 0.000000  |
| O  | 2.352531  | 0.000000  | 0.000000  |
| O  | -2.352531 | 0.000000  | 0.000000  |
| O  | 0.000000  | -2.352531 | 0.000000  |
| LA | -1.375511 | 1.375511  | -1.375511 |
| LA | 1.375511  | -1.375511 | -1.375511 |
| O  | 0.000000  | 0.000000  | -2.352531 |

**La<sub>4</sub>O<sub>6</sub>, C<sub>2v</sub>**

|    |          |          |           |
|----|----------|----------|-----------|
| LA | 0.000000 | 2.283099 | -1.102119 |
| O  | 1.757461 | 2.077276 | 0.052128  |
| O  | 0.000000 | 0.000000 | 2.175824  |
| O  | 0.000000 | 0.000000 | -0.828807 |
| LA | 1.809124 | 0.000000 | 0.992959  |

|    |           |           |           |
|----|-----------|-----------|-----------|
| O  | 1.757461  | -2.077276 | 0.052128  |
| LA | 0.000000  | -2.283099 | -1.102119 |
| O  | -1.757461 | 2.077276  | 0.052128  |
| LA | -1.809124 | 0.000000  | 0.992959  |
| O  | -1.757461 | -2.077276 | 0.052128  |

**La<sub>4</sub>O<sub>6</sub>, C<sub>2h</sub>**

|    |           |           |           |
|----|-----------|-----------|-----------|
| LA | 1.045471  | 2.846376  | 0.000000  |
| O  | 0.000000  | 2.296147  | 1.754032  |
| O  | 1.363859  | 0.554043  | 0.000000  |
| O  | -1.363859 | -0.554043 | 0.000000  |
| LA | 0.000000  | 0.000000  | 1.783019  |
| O  | 0.000000  | -2.296147 | 1.754032  |
| LA | -1.045471 | -2.846376 | 0.000000  |
| O  | 0.000000  | 2.296147  | -1.754032 |
| LA | 0.000000  | 0.000000  | -1.783019 |
| O  | 0.000000  | -2.296147 | -1.754032 |

**La<sub>6</sub>O<sub>9</sub>, O<sub>h</sub>**

|    |           |           |           |
|----|-----------|-----------|-----------|
| LA | 0.000000  | 0.000000  | 2.458448  |
| LA | 0.000000  | 2.458448  | 0.000000  |
| O  | -1.527851 | 1.527851  | 1.527851  |
| LA | -2.458448 | 0.000000  | 0.000000  |
| LA | 2.458448  | 0.000000  | 0.000000  |
| O  | 1.527851  | -1.527851 | 1.527851  |
| LA | 0.000000  | -2.458448 | 0.000000  |
| O  | 1.527851  | 1.527851  | 1.527851  |
| O  | 1.527851  | 1.527851  | -1.527851 |
| O  | 0.000000  | 0.000000  | 0.000000  |
| LA | 0.000000  | 0.000000  | -2.458448 |
| O  | 1.527851  | -1.527851 | -1.527851 |
| O  | -1.527851 | -1.527851 | 1.527851  |
| O  | -1.527851 | 1.527851  | -1.527851 |
| O  | -1.527851 | -1.527851 | -1.527851 |

**La<sub>2</sub>O<sub>2</sub>(CO<sub>3</sub>)**

|    |            |             |             |
|----|------------|-------------|-------------|
| La | 0.88252700 | -1.44614700 | 0.00000000  |
| La | 0.06310000 | 1.69338000  | 0.00000000  |
| O  | 0.88252700 | 0.23056200  | 1.34331500  |
| O  | 0.88252700 | 0.23056200  | -1.34331500 |

|   |             |             |            |
|---|-------------|-------------|------------|
| O | -1.90571500 | 0.66712300  | 0.00000000 |
| O | -1.33698300 | -1.51597600 | 0.00000000 |
| O | -3.51084800 | -0.91659500 | 0.00000000 |
| C | -2.33213400 | -0.60961800 | 0.00000000 |

**La<sub>3</sub>O<sub>3</sub>(CO<sub>3</sub>)(OH) (La<sub>α</sub>-O<sub>α</sub>)**

|    |             |             |             |
|----|-------------|-------------|-------------|
| La | -1.64612500 | 1.02013100  | -0.57338900 |
| O  | 0.46567200  | 0.28141500  | -1.14450200 |
| La | 0.80633800  | -1.78575500 | -0.00364300 |
| O  | 1.99787500  | -0.28940100 | 1.13717800  |
| La | 1.67867400  | 1.59686500  | 0.27051200  |
| O  | -0.35853200 | 2.28558300  | 0.58807300  |
| C  | -2.79182400 | -1.21800600 | 0.83985400  |
| O  | -3.26386600 | -2.17433300 | 1.42318000  |
| O  | -1.49405100 | -1.22354300 | 0.36140800  |
| O  | -3.37418800 | -0.06834100 | 0.55922900  |
| O  | 1.85587600  | -3.32074400 | -1.16131900 |
| H  | 2.30410700  | -3.99777300 | -1.67342300 |

**La<sub>3</sub>O<sub>3</sub>(CO<sub>3</sub>)(OH) (La<sub>α</sub>-O<sub>β</sub>)**

|    |             |             |             |
|----|-------------|-------------|-------------|
| La | -1.07229100 | -1.59013300 | -0.46022900 |
| O  | 0.34599000  | 0.12565800  | -1.18472800 |
| La | 2.12451400  | -0.31977400 | 0.43561600  |
| O  | 1.22910600  | 1.77005600  | 0.91081200  |
| La | -0.36214300 | 2.03321800  | -0.33404500 |
| O  | -2.06477700 | 0.58857300  | 0.25489200  |
| C  | -3.21735100 | -0.00555700 | 0.76441400  |
| O  | -3.16209700 | -1.30518600 | 0.62073700  |
| O  | 0.56255100  | -1.92403600 | 0.76822200  |
| O  | -4.10701100 | 0.67253600  | 1.24311900  |
| O  | 4.08075700  | -0.69250300 | -0.50782000 |
| H  | 4.89338800  | -0.87614700 | -0.98483400 |

**La<sub>4</sub>O<sub>5</sub>(CO<sub>3</sub>) (La<sub>4</sub>O<sub>6</sub>(T<sub>d</sub>))**

|    |           |           |           |
|----|-----------|-----------|-----------|
| O  | -2.105605 | 0.700186  | -0.000162 |
| LA | -1.517077 | -1.791051 | 0.000146  |
| O  | -4.287880 | 1.324708  | -0.001230 |
| LA | -0.455240 | 2.337237  | -0.004236 |
| O  | 0.710754  | 1.644786  | 1.628666  |
| O  | -0.139593 | -1.564509 | -1.674477 |

|    |           |           |           |
|----|-----------|-----------|-----------|
| O  | 0.715704  | 1.639798  | -1.631556 |
| LA | 1.620156  | -0.348886 | -1.947203 |
| O  | -0.141388 | -1.563767 | 1.675828  |
| O  | 2.547861  | -0.598736 | 0.003940  |
| C  | -3.461166 | 0.422003  | -0.001445 |
| LA | 1.614489  | -0.342891 | 1.951652  |
| O  | -3.698063 | -0.861629 | -0.002490 |

**La<sub>4</sub>O<sub>5</sub>(CO<sub>3</sub>) (La<sub>4</sub>O<sub>6</sub>(C<sub>2v</sub>), La<sub>α</sub>-O<sub>γ</sub>)**

|    |             |             |             |
|----|-------------|-------------|-------------|
| La | -2.43579600 | -0.43166100 | -1.22317500 |
| O  | -2.74702400 | 1.16110000  | 0.12473300  |
| O  | -0.29383800 | -0.26790100 | 2.16844500  |
| O  | -0.23022000 | 0.06559100  | -0.77264300 |
| La | -0.84870600 | 1.62967400  | 1.24935400  |
| O  | 1.06326100  | 2.39796100  | 0.31303300  |
| La | 1.89107000  | 1.03659100  | -1.03655200 |
| O  | -1.85212200 | -2.19216100 | -0.18796000 |
| La | 0.11256500  | -1.85351200 | 0.80215500  |
| O  | 2.22936300  | -1.22052900 | -0.15748000 |
| C  | 3.59245500  | -1.07400400 | -0.01600500 |
| O  | 3.97441000  | 0.11797600  | -0.42394000 |
| O  | 4.28800900  | -1.97181100 | 0.43137300  |

**La<sub>4</sub>O<sub>5</sub>(CO<sub>3</sub>) (La<sub>4</sub>O<sub>6</sub>(C<sub>2v</sub>), La<sub>β</sub>-O<sub>γ</sub>)**

|    |           |           |           |
|----|-----------|-----------|-----------|
| LA | -2.270865 | -0.983412 | -1.149365 |
| O  | -2.905715 | 0.470842  | 0.276008  |
| O  | -0.058921 | -0.130936 | 2.112179  |
| O  | -0.258134 | 0.175213  | -0.901610 |
| LA | -1.196984 | 1.476103  | 1.300700  |
| O  | 0.454323  | 2.730308  | 0.246397  |
| LA | 1.442259  | 1.585975  | -1.135409 |
| O  | -1.155409 | -2.485629 | -0.221881 |
| LA | 0.731527  | -1.635542 | 0.736141  |
| O  | 2.578498  | -0.173403 | -0.258040 |
| C  | 3.595165  | -1.074754 | 0.077593  |
| O  | 4.755463  | -0.798169 | -0.188161 |
| O  | 3.113715  | -2.139415 | 0.643433  |

**La<sub>4</sub>O<sub>5</sub>(CO<sub>3</sub>) (La<sub>4</sub>O<sub>6</sub>(C<sub>2v</sub>), La<sub>β</sub>-O<sub>α</sub>)**



|    |             |             |             |
|----|-------------|-------------|-------------|
| La | 1.19611700  | 0.64810000  | 2.26590200  |
| O  | 1.19611700  | -1.47993100 | 2.02473000  |
| O  | -1.65352600 | -1.17072200 | 0.00000000  |
| O  | 0.93981600  | 0.44692900  | 0.00000000  |
| La | 0.48302800  | -2.03271900 | 0.00000000  |
| O  | 1.19611700  | -1.47993100 | -2.02473000 |
| La | 1.19611700  | 0.64810000  | -2.26590200 |
| O  | -0.67693500 | 1.58733600  | 2.05254700  |
| La | -1.59377100 | 1.27680300  | 0.00000000  |
| O  | -0.67693500 | 1.58733600  | -2.05254700 |
| C  | -3.04586900 | -1.25054200 | 0.00000000  |
| O  | -3.59466400 | -2.34114000 | 0.00000000  |
| O  | -3.57620800 | -0.06150300 | 0.00000000  |

**La<sub>4</sub>O<sub>5</sub>(CO<sub>3</sub>) (La<sub>4</sub>O<sub>6</sub>(C<sub>2h</sub>), La<sub>α</sub>-O<sub>α</sub>)**

|    |             |             |             |
|----|-------------|-------------|-------------|
| La | 2.75639100  | 0.76159300  | -0.46338700 |
| O  | 2.23271800  | -1.55326100 | 0.23468400  |
| O  | 0.54782200  | 0.32644700  | -1.11468200 |
| O  | -1.21015800 | -0.22551800 | 1.13272700  |
| La | -0.13281900 | -1.67186600 | -0.28502200 |
| O  | -2.25095300 | -1.82052900 | -0.93556300 |
| La | -3.32160800 | -0.32396600 | 0.14917100  |
| O  | 1.70352900  | 2.21139500  | 0.60894000  |
| La | -0.54094600 | 1.82458100  | 0.27545600  |
| O  | -2.71525700 | 1.60355800  | -0.41514800 |
| C  | 3.45253600  | -1.73766800 | 0.85284800  |
| O  | 3.73514200  | -2.78977200 | 1.40226000  |
| O  | 4.19550700  | -0.65525300 | 0.75409900  |

**La<sub>4</sub>O<sub>5</sub>(CO<sub>3</sub>) (La<sub>4</sub>O<sub>6</sub>(C<sub>2h</sub>), La<sub>β</sub>-O<sub>α</sub>)**

|    |             |             |             |
|----|-------------|-------------|-------------|
| La | -2.78796000 | -0.96831000 | -0.29384100 |
| O  | -1.54628000 | 3.16487300  | 0.57464100  |
| O  | -0.77061700 | -0.56378900 | -1.14665600 |
| O  | 1.06725000  | 0.13797200  | 1.05380800  |
| La | -0.04669500 | 1.59753200  | -0.40322900 |
| O  | 2.12188400  | 1.80369100  | -0.95881500 |
| La | 3.19343800  | 0.36641300  | 0.16296000  |
| O  | -1.72532100 | -2.35967200 | 0.76758600  |
| La | 0.54291900  | -1.91731300 | 0.23727700  |
| O  | 2.68026800  | -1.61273900 | -0.41963400 |

|   |             |            |            |
|---|-------------|------------|------------|
| C | -2.65913900 | 2.50740800 | 0.78888900 |
| O | -3.70359700 | 2.93529300 | 1.25230000 |
| O | -2.55386200 | 1.18077700 | 0.40003900 |

**La<sub>4</sub>O<sub>5</sub>(CO<sub>3</sub>) (La<sub>4</sub>O<sub>6</sub>(C<sub>2h</sub>), La<sub>α</sub>-O<sub>β</sub>)**

|    |             |             |             |
|----|-------------|-------------|-------------|
| La | 0.32427700  | -2.90699600 | 0.00000000  |
| O  | 0.80382200  | -1.81128200 | 1.78048900  |
| O  | -1.37421700 | -0.77709100 | 0.00000000  |
| O  | 1.06039500  | 0.79768900  | 0.00000000  |
| La | -0.12200800 | 0.21165600  | 1.87679600  |
| O  | -0.12200800 | 2.47130100  | 1.81890300  |
| La | 0.82885400  | 3.05118600  | 0.00000000  |
| O  | 0.80382200  | -1.81128200 | -1.78048900 |
| La | -0.12200800 | 0.21165600  | -1.87679600 |
| O  | -0.12200800 | 2.47130100  | -1.81890300 |
| C  | -2.46404100 | -1.66904700 | 0.00000000  |
| O  | -3.60112400 | -1.22410600 | 0.00000000  |
| O  | -2.07809700 | -2.90819800 | 0.00000000  |

**La<sub>6</sub>O<sub>8</sub>(CO<sub>3</sub>) (La<sub>6</sub>O<sub>9</sub>(O<sub>h</sub>))**

|    |           |           |           |
|----|-----------|-----------|-----------|
| LA | 1.194379  | -1.026710 | 1.796399  |
| LA | -1.139534 | 1.517559  | 1.737169  |
| O  | -1.091655 | -0.771417 | 2.156055  |
| LA | -1.904953 | -1.420890 | 0.000000  |
| LA | 1.892559  | 1.835040  | 0.000000  |
| O  | 2.579577  | -0.403425 | 0.000000  |
| LA | 1.194379  | -1.026710 | -1.796399 |
| O  | 1.194379  | 1.216984  | 2.168673  |
| O  | -0.216650 | 2.791967  | 0.000000  |
| O  | 0.049089  | 0.112951  | 0.000000  |
| LA | -1.139534 | 1.517559  | -1.737169 |
| O  | 1.194379  | 1.216984  | -2.168673 |
| O  | 0.355994  | -2.602505 | 0.000000  |
| O  | -2.547364 | 0.900974  | 0.000000  |
| O  | -1.091655 | -0.771417 | -2.156055 |
| C  | -0.207012 | -3.892388 | 0.000000  |
| O  | -1.500617 | -3.851190 | 0.000000  |
| O  | 0.536555  | -4.866020 | 0.000000  |

**Table S3.** Cartesian Coordinates in Angstroms Optimized at the B3LYP/aVDZ Level for Structures on Potential Energy Surfaces Shown by **Figure S3**.

**La<sub>4</sub>O<sub>6</sub> (C<sub>2v</sub>)**

**(La<sub>α</sub>-O<sub>β</sub>)**

**RC**

|    |             |             |             |
|----|-------------|-------------|-------------|
| La | 2.09387900  | 1.31778100  | 0.43275900  |
| O  | 2.10949600  | 0.77373400  | -1.60460300 |
| O  | 0.50960200  | -2.15732900 | -0.72739200 |
| O  | -0.09232300 | 0.63037200  | 0.21384800  |
| La | 0.26205400  | -0.48299200 | -2.07149900 |
| O  | -1.95899900 | -0.03076300 | -1.85405800 |
| La | -2.38637400 | 0.43306300  | 0.16783800  |
| O  | 2.13039300  | -0.35143600 | 1.72754500  |
| La | 0.28432200  | -1.63600300 | 1.36210000  |
| O  | -1.93711400 | -1.15223900 | 1.49731000  |
| C  | -2.05737300 | 3.92519600  | 1.21765400  |
| H  | -2.84354200 | 4.00339300  | 0.45552100  |
| H  | -1.26157900 | 3.24845000  | 0.87614600  |
| H  | -1.62851000 | 4.92091700  | 1.38083000  |
| H  | -2.48181100 | 3.56193600  | 2.16207300  |

**TS**

|    |             |             |             |
|----|-------------|-------------|-------------|
| La | 2.40033500  | -0.07399800 | 1.12669400  |
| O  | 2.18402800  | 1.72531300  | 0.06681500  |
| O  | 0.20029400  | 0.13102700  | -2.18566900 |
| O  | 0.03185500  | -0.04544200 | 0.82101200  |
| La | 0.14191900  | 1.90177400  | -0.95622900 |
| O  | -1.97047800 | 1.81417200  | -0.19885100 |
| La | -2.52931400 | -0.02219400 | 0.72188500  |
| O  | 2.16081500  | -1.74251200 | -0.11671500 |
| La | 0.11982900  | -1.76803200 | -1.16199100 |
| O  | -2.00234400 | -1.72921300 | -0.42755300 |
| C  | -1.29778200 | -0.33509500 | 3.17653000  |
| H  | -1.91079900 | 0.48039900  | 3.61443700  |
| H  | -0.44154000 | -0.15872700 | 1.82404400  |
| H  | -0.41454200 | -0.39683900 | 3.83898500  |
| H  | -1.84758200 | -1.28138300 | 3.36058800  |

**PC**

|    |             |             |            |
|----|-------------|-------------|------------|
| La | -0.11605300 | 2.71669200  | 0.00000000 |
| O  | -0.99738200 | 1.95953200  | 1.74002600 |
| O  | -2.01952700 | -0.76674800 | 0.00000000 |
| O  | 0.74195600  | 0.45950300  | 0.00000000 |
| La | -0.99738200 | -0.33675200 | 1.85412400 |

|    |             |             |             |
|----|-------------|-------------|-------------|
| O  | 0.59979100  | -1.88407400 | 1.78435900  |
| La | 1.77699700  | -2.02457800 | 0.00000000  |
| O  | -0.99738200 | 1.95953200  | -1.74002600 |
| La | -0.99738200 | -0.33675200 | -1.85412400 |
| O  | 0.59979100  | -1.88407400 | -1.78435900 |
| C  | 3.62228000  | -0.07758000 | 0.00000000  |
| H  | 4.20607100  | -0.40163800 | 0.88768600  |
| H  | 1.74723400  | 0.43293300  | 0.00000000  |
| H  | 3.71678300  | 1.02567100  | 0.00000000  |
| H  | 4.20607100  | -0.40163800 | -0.88768600 |

**(La<sub>α</sub>-O<sub>β</sub>)**

**RC**

|    |             |             |             |
|----|-------------|-------------|-------------|
| La | 1.10413600  | 0.54449400  | 2.27625400  |
| O  | 1.10413600  | -1.56163500 | 2.07106800  |
| O  | -1.65015100 | -1.23416400 | 0.00000000  |
| O  | 0.88422200  | 0.39476600  | 0.00000000  |
| La | 0.33060200  | -2.11135500 | 0.00000000  |
| O  | 1.10413600  | -1.56163500 | -2.07106800 |
| La | 1.10413600  | 0.54449400  | -2.27625400 |
| O  | -0.82559200 | 1.39106200  | 2.07757200  |
| La | -1.65186500 | 0.92910900  | 0.00000000  |
| O  | -0.82559200 | 1.39106200  | -2.07757200 |
| C  | -4.88305500 | 1.47521000  | 0.00000000  |
| H  | -4.47769500 | 1.95076000  | 0.90412900  |
| H  | -4.47769500 | 1.95076000  | -0.90412900 |
| H  | -4.66467400 | 0.39832600  | 0.00000000  |
| H  | -5.97045000 | 1.60892700  | 0.00000000  |

**TS**

|    |             |             |             |
|----|-------------|-------------|-------------|
| La | 1.07505600  | 0.59271600  | 2.27158400  |
| O  | 1.07505600  | -1.52004500 | 2.06560000  |
| O  | -1.72756100 | -1.30409200 | 0.00000000  |
| O  | 0.85343100  | 0.39104800  | 0.00000000  |
| La | 0.35222300  | -2.06964300 | 0.00000000  |
| O  | 1.07505600  | -1.52004500 | -2.06560000 |
| La | 1.07505600  | 0.59271600  | -2.27158400 |
| O  | -0.83367100 | 1.47675800  | 2.04216100  |
| La | -1.71767100 | 1.06427900  | 0.00000000  |
| O  | -0.83367100 | 1.47675800  | -2.04216100 |
| C  | -4.16566900 | -0.16886400 | 0.00000000  |
| H  | -4.49983800 | 0.40248000  | 0.89159200  |
| H  | -4.49983800 | 0.40248000  | -0.89159200 |
| H  | -2.82255400 | -0.97345300 | 0.00000000  |
| H  | -4.77875800 | -1.08528600 | 0.00000000  |

**PC**

|    |             |             |             |
|----|-------------|-------------|-------------|
| La | -0.69649800 | -2.21883800 | -1.04553800 |
| O  | -1.73459900 | -2.05548000 | 0.82348700  |
| O  | 0.61463000  | 0.12015300  | 2.22025100  |
| O  | -1.08872100 | 0.01577900  | -0.91866600 |
| La | -1.66105500 | 0.07523500  | 1.43588200  |
| O  | -1.60484500 | 2.19404300  | 0.75163700  |
| La | -0.53370500 | 2.21727100  | -1.10545200 |
| O  | 1.34795800  | -1.92229200 | -0.61965200 |
| La | 2.23364300  | -0.09042200 | 0.32520200  |
| O  | 1.48370000  | 1.75862700  | -0.70532900 |
| C  | 4.79891000  | -0.08463600 | 0.75063400  |
| H  | 5.29875200  | -1.03634400 | 0.47993400  |
| H  | 5.30939000  | 0.70243200  | 0.15857500  |
| H  | 0.85422700  | 0.79950500  | 2.86309400  |
| H  | 5.08323700  | 0.11053500  | 1.80537100  |

**(La<sub>β</sub>-O<sub>γ</sub>)****PC**

|    |             |             |             |
|----|-------------|-------------|-------------|
| La | 2.22538000  | 0.95789300  | -0.99814000 |
| O  | 2.77703400  | -0.25927000 | 0.63634100  |
| O  | -0.30839100 | 0.38412700  | 2.02195200  |
| O  | 0.31547000  | -0.31163600 | -0.83167500 |
| La | 0.92257100  | -1.30175500 | 1.46077300  |
| O  | -0.57298600 | -2.70407600 | 0.46983900  |
| La | -1.48226800 | -1.69826100 | -1.16022000 |
| O  | 0.84881000  | 2.48558200  | -0.48302500 |
| La | -1.05197500 | 1.53090800  | 0.34246500  |
| O  | -2.52330400 | 0.05677600  | -0.60533400 |
| C  | -3.92285200 | 3.18997400  | 1.05632800  |
| H  | -3.51775700 | 2.96075600  | 2.05131800  |
| H  | -3.29589900 | 3.93949700  | 0.55395400  |
| H  | -3.99709200 | 2.27477200  | 0.45319300  |
| H  | -4.92658400 | 3.61239700  | 1.18069200  |

**TS**

|    |             |             |             |
|----|-------------|-------------|-------------|
| La | 2.31332800  | 0.56673500  | -1.06849000 |
| O  | 2.63835500  | -0.91099600 | 0.41592000  |
| O  | -0.13884900 | 0.26348700  | 2.08909900  |
| O  | 0.14563200  | -0.23320600 | -0.88000100 |
| La | 0.68709300  | -1.56782700 | 1.34395000  |
| O  | -1.13732400 | -2.51214900 | 0.30830300  |
| La | -1.85407000 | -1.23688300 | -1.17068900 |
| O  | 1.39688700  | 2.29058900  | -0.27850300 |
| La | -0.63528100 | 1.76813900  | 0.59772500  |
| O  | -2.63196200 | 0.66597100  | -0.43291900 |
| C  | -3.08806900 | 3.06034800  | 0.74003500  |
| H  | -3.00662000 | 3.12222800  | 1.84713600  |
| H  | -2.65173300 | 4.00318400  | 0.34391800  |

|   |             |            |            |
|---|-------------|------------|------------|
| H | -2.95770000 | 1.64337500 | 0.01947300 |
| H | -4.16844300 | 3.14015500 | 0.53177700 |

**PC**

|    |             |             |             |
|----|-------------|-------------|-------------|
| La | -0.29775400 | 2.27381700  | -1.09954900 |
| O  | 0.65975400  | 2.55781000  | 0.78803300  |
| O  | -0.60538300 | -0.38783800 | 1.79377200  |
| O  | 0.88290400  | 0.30075900  | -1.04187100 |
| La | 1.25901400  | 0.60386200  | 1.67855400  |
| O  | 2.48023500  | -1.20386900 | 0.81632400  |
| La | 1.69355700  | -1.67833400 | -1.00872300 |
| O  | -2.06388600 | 1.16430300  | -0.83261600 |
| La | -2.04829200 | -0.83472300 | 0.19148000  |
| O  | -0.52457600 | -2.58543500 | -0.89187400 |
| C  | -4.35614600 | -1.73431900 | 1.00152700  |
| H  | -4.33520300 | -2.09979300 | 2.04798900  |
| H  | -5.15264000 | -0.96363400 | 0.97000900  |
| H  | -0.83602400 | -3.49745900 | -0.90017300 |
| H  | -4.74353400 | -2.58246200 | 0.39845300  |

**(La<sub>α</sub>-O<sub>γ</sub>)**

**RC**

|    |             |             |             |
|----|-------------|-------------|-------------|
| La | 2.46459200  | 0.00193500  | -1.12535000 |
| O  | 2.27679200  | -1.75717500 | 0.03036200  |
| O  | 0.21786400  | -0.00096200 | 2.17983600  |
| O  | 0.18677600  | 0.00093000  | -0.82093300 |
| La | 0.20887200  | -1.80848200 | 0.99322400  |
| O  | -1.88098600 | -1.76316700 | 0.08011500  |
| La | -2.10942600 | -0.00124000 | -1.06844400 |
| O  | 2.27482300  | 1.75955900  | 0.03210100  |
| La | 0.20638400  | 1.80735000  | 0.99412000  |
| O  | -1.88407500 | 1.75990300  | 0.08177300  |
| C  | -5.33977000 | 0.00324200  | -0.09219200 |
| H  | -4.78150900 | -0.90009400 | 0.19058000  |
| H  | -6.29663700 | 0.00406000  | 0.44288900  |
| H  | -4.77821700 | 0.90374900  | 0.19303000  |
| H  | -5.54864300 | 0.00509900  | -1.17171600 |

**TS**

|    |             |             |             |
|----|-------------|-------------|-------------|
| La | 2.35797000  | -0.21184400 | 1.21926300  |
| O  | 2.40742700  | 1.54194000  | 0.04378500  |
| O  | 0.26474100  | -0.03025700 | -2.19221500 |
| O  | 0.10151300  | 0.00314900  | 0.77590600  |
| La | 0.42872300  | 1.79529800  | -1.03757300 |
| O  | -1.66765600 | 2.05066200  | -0.15872300 |
| La | -2.18372500 | 0.38274400  | 0.98391100  |

|    |             |             |             |
|----|-------------|-------------|-------------|
| O  | 2.05531900  | -1.94399500 | 0.04762000  |
| La | 0.05235000  | -1.80937500 | -0.99311600 |
| O  | -2.09122900 | -1.63045500 | -0.15290200 |
| C  | -4.59799700 | -0.84349300 | 0.35102600  |
| H  | -4.96831000 | 0.07739400  | -0.14448400 |
| H  | -5.17026700 | -1.66877600 | -0.10365300 |
| H  | -3.24028700 | -1.41801000 | -0.00342600 |
| H  | -4.94716000 | -0.79688400 | 1.40595600  |

### PC

|    |             |             |             |
|----|-------------|-------------|-------------|
| La | -1.84558400 | -0.83962800 | 1.41651000  |
| O  | -1.77238700 | -2.00106500 | -0.32911600 |
| O  | -0.69901100 | 0.88663500  | -2.10615800 |
| O  | 0.11792900  | -0.02846700 | 0.51426700  |
| La | -0.15860900 | -1.22548100 | -1.73476900 |
| O  | 2.01422700  | -1.22931400 | -1.22934100 |
| La | 2.40901800  | 0.00301300  | 0.45812800  |
| O  | -2.37093600 | 1.17138100  | 0.91741800  |
| La | -0.74483900 | 2.04511900  | -0.32069200 |
| O  | 1.66783000  | 2.38980600  | 0.26519100  |
| C  | 2.81601900  | -1.23306400 | 2.73229100  |
| H  | 3.78508100  | -1.76999000 | 2.78388800  |
| H  | 2.80182000  | -0.56346500 | 3.61576800  |
| H  | 2.18655000  | 3.19861400  | 0.32167700  |
| H  | 2.05001800  | -2.01087700 | 2.93382600  |

### La<sub>4</sub>O<sub>6</sub> (C<sub>2h</sub>)

#### (La<sub>α</sub>-O<sub>β</sub>)

### RC

|    |             |             |             |
|----|-------------|-------------|-------------|
| La | 1.22708500  | 2.92561700  | 0.00000000  |
| O  | 0.18090000  | 2.37769900  | 1.75352100  |
| O  | 1.54939100  | 0.62943300  | 0.00000000  |
| O  | -1.19588000 | -0.43433700 | 0.00000000  |
| La | 0.18090000  | 0.07965900  | 1.78244100  |
| O  | 0.09813200  | -2.21283900 | 1.76573100  |
| La | -0.94853500 | -2.74083700 | 0.00000000  |
| O  | 0.18090000  | 2.37769900  | -1.75352100 |
| La | 0.18090000  | 0.07965900  | -1.78244100 |
| O  | 0.09813200  | -2.21283900 | -1.76573100 |
| C  | -4.37384300 | -2.38187100 | 0.00000000  |
| H  | -3.72028500 | -1.49779400 | 0.00000000  |
| H  | -5.41740000 | -2.04641100 | 0.00000000  |
| H  | -4.20591600 | -2.98834400 | -0.90093400 |
| H  | -4.20591600 | -2.98834400 | 0.90093400  |

### TS

|    |             |             |            |
|----|-------------|-------------|------------|
| La | -0.45167500 | -2.96396300 | 0.00000000 |
|----|-------------|-------------|------------|

|    |             |             |             |
|----|-------------|-------------|-------------|
| O  | 0.34890300  | -2.08457200 | 1.76791200  |
| O  | -1.39901000 | -0.53111300 | 0.00000000  |
| O  | 1.27222600  | 0.70555000  | 0.00000000  |
| La | -0.02749800 | 0.14560900  | 1.81829000  |
| O  | -0.02749800 | 2.43283200  | 1.77040700  |
| La | 0.99450700  | 2.99026900  | 0.00000000  |
| O  | 0.34890300  | -2.08457200 | -1.76791200 |
| La | -0.02749800 | 0.14560900  | -1.81829000 |
| O  | -0.02749800 | 2.43283200  | -1.77040700 |
| C  | -3.17616200 | -2.56402500 | 0.00000000  |
| H  | -4.07684900 | -1.92748900 | 0.00000000  |
| H  | -3.29071400 | -3.21782000 | 0.89046600  |
| H  | -3.29071400 | -3.21782000 | -0.89046600 |
| H  | -2.21966400 | -1.31925000 | 0.00000000  |

**PC**

|    |             |             |             |
|----|-------------|-------------|-------------|
| La | -1.86277000 | -2.28939400 | 0.00000000  |
| O  | -0.59626000 | -1.97358600 | 1.78571500  |
| O  | -1.15735000 | 0.12421800  | 0.00000000  |
| O  | 1.81084000  | 0.31975800  | 0.00000000  |
| La | 0.49538900  | -0.10653600 | 1.88126700  |
| O  | 0.49538900  | 2.16016200  | 1.75540500  |
| La | 1.56176500  | 2.65710100  | 0.00000000  |
| O  | -0.59626000 | -1.97358600 | -1.78571500 |
| La | 0.49538900  | -0.10653600 | -1.88126700 |
| O  | 0.49538900  | 2.16016200  | -1.75540500 |
| C  | -4.44500700 | -1.83539700 | 0.00000000  |
| H  | -4.80031500 | -1.26715400 | 0.88319500  |
| H  | -5.03995100 | -2.77418600 | 0.00000000  |
| H  | -4.80031500 | -1.26715400 | -0.88319500 |
| H  | -1.62039300 | 0.96962000  | 0.00000000  |

**(La<sub>β</sub>-O<sub>α</sub>)**

**RC**

|    |             |             |             |
|----|-------------|-------------|-------------|
| La | -3.02380700 | -0.20845300 | 0.19041500  |
| O  | -2.17774200 | -1.77047100 | -0.95785900 |
| O  | -0.93011400 | -0.37047000 | 1.14579800  |
| O  | 0.97693600  | 0.05777700  | -1.06114500 |
| La | 0.01929200  | -1.90380000 | -0.29433500 |
| O  | 2.18732500  | -2.00503300 | 0.45999800  |
| La | 3.03553000  | -0.12211100 | -0.00962000 |
| O  | -2.21440800 | 1.68355700  | -0.31333600 |
| La | -0.00579300 | 1.60246000  | 0.35292700  |
| O  | 2.15757400  | 1.44418500  | 1.10463000  |
| C  | -0.14403400 | 4.36640400  | -1.66383300 |
| H  | 0.28619200  | 4.76947500  | -0.73582000 |
| H  | -1.06398800 | 3.80005300  | -1.45852200 |
| H  | -0.38524200 | 5.20765200  | -2.32417200 |
| H  | 0.59299500  | 3.72653800  | -2.16826100 |



**TS**

|    |             |             |             |
|----|-------------|-------------|-------------|
| La | 3.01481100  | -0.32005300 | -0.24059000 |
| O  | 2.14480300  | -1.89063400 | 0.83339700  |
| O  | 0.92218600  | -0.28106600 | -1.10219000 |
| O  | -1.01927900 | 0.05277300  | 1.09051200  |
| La | -0.09481900 | -1.87387100 | 0.23568100  |
| O  | -2.24618700 | -1.89628400 | -0.54106800 |
| La | -3.07657400 | -0.03610600 | 0.02756000  |
| O  | 2.43274400  | 1.64295000  | 0.46472200  |
| La | -0.03907900 | 1.68753200  | -0.22304000 |
| O  | -2.14972200 | 1.57545400  | -0.99579200 |
| C  | 0.99690300  | 3.73470000  | 1.32704300  |
| H  | 0.61297500  | 4.49778700  | 0.61575300  |
| H  | 1.90025000  | 2.58228500  | 0.89007800  |
| H  | 1.79591500  | 4.24403600  | 1.89042900  |
| H  | 0.18580800  | 3.56458300  | 2.06703400  |

**PC**

|    |             |             |             |
|----|-------------|-------------|-------------|
| La | -3.08438900 | -0.18251300 | 0.27512200  |
| O  | -2.40296200 | -1.77037300 | -0.83118200 |
| O  | -1.05554000 | -0.21509300 | 1.03343800  |
| O  | 1.03540300  | -0.02188200 | -1.09319900 |
| La | -0.08042700 | -1.84547000 | -0.30514600 |
| O  | 1.97958400  | -2.10600800 | 0.55918100  |
| La | 3.03219400  | -0.32058000 | 0.04880900  |
| O  | -2.36778800 | 1.86070900  | -0.50585400 |
| La | 0.22435800  | 1.77849100  | 0.17198400  |
| O  | 2.24105700  | 1.33889300  | 1.07430800  |
| C  | 0.20185600  | 4.01080200  | -1.21402700 |
| H  | -0.54406700 | 4.74836800  | -0.84850900 |
| H  | -2.44866500 | 2.59229400  | -1.12696300 |
| H  | -0.05306100 | 3.84362800  | -2.28164000 |
| H  | 1.16763500  | 4.55507600  | -1.22610200 |

**(La<sub>β</sub>-O<sub>β</sub>)****RC**

|    |             |             |             |
|----|-------------|-------------|-------------|
| La | -3.02380700 | -0.20845300 | 0.19041500  |
| O  | -2.17774200 | -1.77047100 | -0.95785900 |
| O  | -0.93011400 | -0.37047000 | 1.14579800  |
| O  | 0.97693600  | 0.05777700  | -1.06114500 |
| La | 0.01929200  | -1.90380000 | -0.29433500 |
| O  | 2.18732500  | -2.00503300 | 0.45999800  |
| La | 3.03553000  | -0.12211100 | -0.00962000 |
| O  | -2.21440800 | 1.68355700  | -0.31333600 |
| La | -0.00579300 | 1.60246000  | 0.35292700  |
| O  | 2.15757400  | 1.44418500  | 1.10463000  |
| C  | -0.14403400 | 4.36640400  | -1.66383300 |
| H  | 0.28619200  | 4.76947500  | -0.73582000 |
| H  | -1.06398800 | 3.80005300  | -1.45852200 |
| H  | -0.38524200 | 5.20765200  | -2.32417200 |

|   |            |            |             |
|---|------------|------------|-------------|
| H | 0.59299500 | 3.72653800 | -2.16826100 |
|---|------------|------------|-------------|

**TS**

|    |             |             |             |
|----|-------------|-------------|-------------|
| La | 3.00350400  | -0.08219500 | -0.37111200 |
| O  | 2.30252900  | -1.70690500 | 0.83402800  |
| O  | 0.82208800  | -0.22986500 | -0.95806900 |
| O  | -1.17583700 | -0.03694600 | 1.28764100  |
| La | 0.07833900  | -1.86404200 | 0.41624500  |
| O  | -1.94728500 | -1.98613200 | -0.65569300 |
| La | -2.98682200 | -0.19222900 | -0.32618900 |
| O  | 2.28482700  | 1.83024600  | 0.18173600  |
| La | 0.02332400  | 1.81801400  | -0.08662600 |
| O  | -1.98856200 | 1.46562400  | -1.12709900 |
| C  | -0.88575700 | 2.40525600  | 2.41960200  |
| H  | -1.49984900 | 3.24042100  | 2.01786500  |
| H  | -1.07935100 | 0.91893900  | 1.86145400  |
| H  | 0.10712300  | 2.83171400  | 2.66791900  |
| H  | -1.34116600 | 2.15496300  | 3.39269600  |

**PC**

|    |             |             |             |
|----|-------------|-------------|-------------|
| La | 2.72663600  | -0.71552100 | 0.41809200  |
| O  | 1.38852100  | -2.37736300 | 0.58352600  |
| O  | 1.04491500  | -0.14043600 | -1.05700000 |
| O  | -1.49439800 | -1.37684800 | 1.35219300  |
| La | -0.35004200 | -1.90627800 | -0.74505800 |
| O  | -2.31497500 | -0.85719700 | -1.21857200 |
| La | -2.98631200 | 0.24129600  | 0.43380300  |
| O  | 2.08107900  | 1.09351800  | 1.27480400  |
| La | 0.53195500  | 2.00258400  | -0.09581000 |
| O  | -1.67714500 | 1.85857400  | 0.46750800  |
| C  | 1.40602000  | 4.03921300  | -1.47689000 |
| H  | -0.91594500 | -1.43759300 | 2.12073500  |
| H  | 2.21692000  | 3.76529200  | -2.18306700 |
| H  | 0.63416000  | 4.54344000  | -2.09233600 |
| H  | 1.83726500  | 4.83294200  | -0.83220800 |

**(La<sub>α</sub>-O<sub>α</sub>)**

**RC**

|    |             |             |             |
|----|-------------|-------------|-------------|
| La | -2.81940200 | 0.47853900  | -0.09803100 |
| O  | -2.17515100 | -1.33275000 | -0.99731500 |
| O  | -0.82051300 | 0.12033400  | 1.01385600  |
| O  | 1.20627900  | 0.01738800  | -1.11510900 |
| La | -0.04814700 | -1.68790400 | -0.19489800 |
| O  | 2.06487400  | -2.01913000 | 0.64809700  |
| La | 3.19172800  | -0.33978000 | 0.02920300  |
| O  | -1.69792800 | 2.16467900  | -0.72442900 |
| La | 0.42323200  | 1.83207300  | 0.08607600  |
| O  | 2.53759500  | 1.46732600  | 0.91749200  |
| C  | -5.14938600 | -1.94401200 | 1.21676900  |
| H  | -5.84840100 | -1.15511600 | 0.90584800  |

|   |             |             |            |
|---|-------------|-------------|------------|
| H | -4.65330800 | -1.65343900 | 2.15268300 |
| H | -5.72210600 | -2.86207400 | 1.39403300 |
| H | -4.40355900 | -2.13492900 | 0.43222100 |

**TS**

|    |             |             |             |
|----|-------------|-------------|-------------|
| La | 2.88646900  | 0.31389800  | -0.33525200 |
| O  | 2.15880300  | -1.71001000 | 0.53558700  |
| O  | 0.70649600  | 0.11633000  | -1.11307700 |
| O  | -1.12722800 | -0.08304100 | 1.15980400  |
| La | -0.08827400 | -1.75471400 | -0.05277000 |
| O  | -2.23473300 | -1.81764900 | -0.77848700 |
| La | -3.20404000 | -0.15274000 | 0.11364600  |
| O  | 1.97324000  | 1.95023000  | 0.59333700  |
| La | -0.28582800 | 1.80090700  | 0.11660000  |
| O  | -2.45835400 | 1.69194900  | -0.59557800 |
| C  | 4.74735300  | -1.25739500 | 1.04074800  |
| H  | 5.04463100  | -0.38124200 | 1.65406300  |
| H  | 5.45578700  | -1.29933300 | 0.18551100  |
| H  | 4.99062600  | -2.13611900 | 1.66093500  |
| H  | 3.30442400  | -1.64035300 | 0.83551600  |

**PC**

|    |             |             |             |
|----|-------------|-------------|-------------|
| La | 2.96781000  | 0.00045300  | -0.12274000 |
| O  | 1.99037300  | 2.18422000  | -0.91802300 |
| O  | 0.84904900  | 0.12671900  | 0.85241900  |
| O  | -1.25018000 | 0.03590000  | -1.13457200 |
| La | -0.32764200 | 1.80892200  | -0.01705000 |
| O  | -2.35991600 | 1.69178700  | 0.84977500  |
| La | -3.22772500 | -0.12201700 | 0.07865200  |
| O  | 2.02981900  | -1.78218000 | -0.84355000 |
| La | -0.09637100 | -1.75615000 | -0.13928200 |
| O  | -2.22830700 | -1.81458400 | 0.77965900  |
| C  | 4.81885400  | -0.26268700 | 1.68429100  |
| H  | 5.63293400  | -0.95979500 | 1.39944300  |
| H  | 4.40877200  | -0.66427200 | 2.63296700  |
| H  | 5.32135400  | 0.68725300  | 1.95934000  |
| H  | 2.46103400  | 2.89919100  | -1.35923900 |
